# Supplementary material for: Myths in psychology: psychological misconceptions among Spanish psychology students
Source: PeerJ journal article supplement (doi:10.7717/peerj.13811), 2022-08-11

## SUPPLEMENTARY MATERIAL

Table 1.

Sample distribution of participants according to academic year (1-4) and University (face-to-face, UAM and online, UNED).

| University<br>Year | Face-to-face | Online     | TOTAL      |
|--------------------|--------------|------------|------------|
| 1 <sup>st</sup>    | 139 (38%)    | 325 (59%)  | 464 (51%)  |
| 2 <sup>nd</sup>    | 109 (30%)    | 111 (20%)  | 220 (24%)  |
| 3 <sup>rd</sup>    | 59 (16%)     | 52 (9%)    | 111 (12%)  |
| 4 <sup>th</sup>    | 57 (16%)     | 64 (12%)   | 121 (13%)  |
| <b>TOTAL</b>       | <b>364</b>   | <b>552</b> | <b>916</b> |

Table 2

Items used in the questionnaire and whether were used by Gardner and Brown (2013). All items, used by Gardner and Brown (2013) and the new items that we included, were extracted from the book 50 Great Myths of Popular Psychology (Lilienfeld et al., 2010).

| Item                                                                                                                   | Presented in Gardner & Brown, 2013 |
|------------------------------------------------------------------------------------------------------------------------|------------------------------------|
| 1. Most people use only about 10% of their brain power.                                                                | Yes                                |
| 2. Almost all color-blind people can see at least some colors. (*)                                                     | Yes                                |
| 3. Some people are exclusively left-brained while others are right-brained.                                            | Yes                                |
| 4. Extrasensory perception is NOT a real phenomenon. (*)                                                               | No                                 |
| 5. Subliminal messages can't persuade people to perform some behaviors. (*)                                            | No                                 |
| 6. Humans have an invisible body energy that can cause psychological problems when blocked.                            | No                                 |
| 7. People become increasingly satisfied with their lives in old age. (*)                                               | Yes                                |
| 8. Most adopted children are psychologically healthy.                                                                  | Yes                                |
| 9. Married couples enjoy more marital satisfaction after they have children.                                           | Yes                                |
| 10. Infants establish attachment bonds only to their mothers.                                                          | Yes                                |
| 11. Playing classic music to infants DON'T boosts their intelligence. (*)                                              | No                                 |
| 12. When dying, people DON'T pass through a universal series of psychological stages. (*)                              | No                                 |
| 13. Individuals commonly DON'T repress the memories of traumatic experiences. (*)                                      | Yes                                |
| 14. People with amnesia can still recall some details of their earlier lives. (*)                                      | Yes                                |
| 15. The memory of everything we've experienced is stored permanently in our brains, even if we can't access all of it. | Yes                                |
| 16. With effort, we can remember events back to the time of our birth.                                                 | Yes                                |
| 17. Some people have true photographic memories.                                                                       | Yes                                |
| 18. Human memory works like a tape recorder, and accurately records events we've experienced.                          | No                                 |

|                                                                                                                                  |     |
|----------------------------------------------------------------------------------------------------------------------------------|-----|
| 19. Rote memorization is NOT the best way to retain information. (*)                                                             | No  |
| 20. IQ scores are relatively unstable during childhood. (*)                                                                      | Yes |
| 21. There is a modest correlation between brain size and IQ in humans. (*)                                                       | Yes |
| 22. As a general rule, students typically recall only 10% of what they read.                                                     | Yes |
| 23. Irregularly provided feedback best promotes long-term learning. (*)                                                          | Yes |
| 24. Negative reinforcement is a type of punishment.                                                                              | Yes |
| 25. Students learn best when teaching styles are matched to their learning styles.                                               | No  |
| 26. Direct instruction is superior to discovery learning. (*)                                                                    | No  |
| 27. Hearing material while we are asleep (sleep learning) can be an effective aid to learning.                                   | Yes |
| 28. Hypnotized people are aware of their surroundings and can recall the details of conversations overheard during hypnosis. (*) | Yes |
| 29. It is impossible to lie under hypnosis.                                                                                      | Yes |
| 30. Virtually all people dream. (*)                                                                                              | Yes |
| 31. Our brains rest during sleep.                                                                                                | Yes |
| 32. Researchers have demonstrated that dreams possess symbolic meaning.                                                          | No  |
| 33. Awakenning a sleepwalker is NOT dangerous. (*)                                                                               | No  |
| 34. The polygraph (lie detector) test is NOT an accurate means of detecting dishonesty. (*)                                      | Yes |
| 35. Ulcers are caused primarily by stress.                                                                                       | Yes |
| 36. Women are NO better than men at accurately guessing the feelings of others. (*)                                              | Yes |
| 37. Unfamiliarity breeds contempt: We dislike things we have less exposure to. (*)                                               | Yes |
| 38. Positive thinking is better than negative thinking for all people.                                                           | No  |
| 39. Voice stress analyzers can help to detect lying.                                                                             | No  |
| 40. We are most romantically attracted to people who are similar to us. (*)                                                      | Yes |
| 41. The more people present at an emergency, the greater the chance that someone will intervene.                                 | Yes |

|                                                                                                                                     |     |
|-------------------------------------------------------------------------------------------------------------------------------------|-----|
| 42. Expressing anger directly toward another person or object makes us more aggressive. (*)                                         | Yes |
| 43. Groups tend to make less extreme decisions than individuals.                                                                    | Yes |
| 44. The best way to change someone's attitude is to give them a large reward to do so.                                              | Yes |
| 45. Men and women communicate in completely different ways.                                                                         | No  |
| 46. People's attitudes are NOT highly predictive of their behaviors. (*)                                                            | No  |
| 47. We CANNOT tell a person's personality by merely looking at their handwriting. (*)                                               | Yes |
| 48. Knowing a person's astrological sign predicts their personality traits at better than chance levels.                            | Yes |
| 49. Most people who were physically abused as children DON'T go on to become abusers themselves. (*)                                | Yes |
| 50. Most children survive the divorce of their parents without much, if any, long-term psychological damage. (*)                    | Yes |
| 51. Obese people are more cheerful ("jolly") than thin people.                                                                      | Yes |
| 52. The fact that a trait is heritable means we CAN'T change it.                                                                    | No  |
| 53. People's responses to inkblots tell us a great deal about their personalities.                                                  | No  |
| 54. Only deeply depressed people commit suicide.                                                                                    | Yes |
| 55. People with schizophrenia DON'T have multiple personalities. (*)                                                                | Yes |
| 56. There has recently been a massive epidemic of childhood autism.                                                                 | Yes |
| 57. All clinically depressed people suffer from extreme sadness.                                                                    | Yes |
| 58. Most people who experience severe trauma, (e.g., as in military combat) DON'T develop posttraumatic stress disorder (PTSD). (*) | Yes |
| 59. Psychiatric hospital admissions and crimes DON'T increase during full moons. (*)                                                | No  |
| 60. Hallucinations are almost always a sign of serious mental illness.                                                              | No  |
| 61. Homicide is more common than suicide.                                                                                           | Yes |
| 62. Most rapes are committed by strangers.                                                                                          | Yes |
| 63. The words "insanity" and "sanity" are purely legal NOT psychological terms. (*)                                                 | Yes |

|                                                                                                        |     |
|--------------------------------------------------------------------------------------------------------|-----|
| 64. Most people that plead insanity are NOT faking mental illness. (*)                                 | Yes |
| 65. Most psychopaths are violent.                                                                      | No  |
| 66. Rehabilitation programs have NO effect on the recidivism rates of criminals.                       | No  |
| 67. Crowding consistently leads to more aggression.                                                    | No  |
| 68. More experienced therapists are generally NO more effective than those with little experience. (*) | Yes |
| 69. Most psychotherapy involves a couch and exploring one's early past.                                | Yes |
| 70. Antidepressants are much more effective than psychotherapy for treating depression.                | Yes |
| 71. Taking a placebo (i.e. sugar pill) can change brain functioning and its chemistry. (*)             | Yes |
| 72. Electroconvulsive therapy is rarely administered today.                                            | Yes |
| 73. Expert judgment and intuition are the best means of making clinical decisions.                     | No  |
| 74. Most modern therapies are NOT based on the teachings of Freud. (*)                                 | No  |
| <b>Item used by Gardner and Brown (2013) and excluded from the questionnaire</b>                       |     |
| Visual perceptions are accompanied by tiny emissions from the eyes.                                    |     |
| Adult humans can grow new brain cells. (*)                                                             |     |
| A small percentage of the elderly live in nursing homes. (*)                                           |     |
| Extreme fear can turn our hair white                                                                   |     |

Table 3

Relation of means and standard deviations (in parentheses) of the total score, according to the academic year.

|              | Total score on the scale |                      |                      |                      | TOTAL             |
|--------------|--------------------------|----------------------|----------------------|----------------------|-------------------|
|              | 1 <sup>st</sup> year     | 2 <sup>nd</sup> year | 3 <sup>rd</sup> year | 4 <sup>th</sup> year |                   |
| Face-to-face | 178.60<br>(16.77)        | 179.89<br>(19.39)    | 172.63<br>(18.67)    | 173.86<br>(18.09)    | 177.27<br>(18.25) |
| Online       | 212.24<br>(20.55)        | 203.17<br>(19.01)    | 198.85<br>(24.27)    | 188.41<br>(21.07)    | 206.39<br>(22.15) |
| TOTAL        | 202.16<br>(24.84)        | 191.63<br>(22.43)    | 184.91<br>(25.09)    | 181.55<br>(20.95)    |                   |

Table 4

Summary of the Two-Factor ANOVA (university and academic year).

| Source          | Df  | F       | P       | $\eta_G^2$ |
|-----------------|-----|---------|---------|------------|
| University      | 1   | 251.321 | < 0.001 | 0.216      |
| Year            | 3   | 19.295  | < 0.001 | 0.059      |
| University*year | 3   | 8.35    | < 0.001 | 0.027      |
| Residue         | 908 |         |         |            |

Table 5

Scientific dissemination sources indicated by the participants.

| Scientific dissemination sources                         | Frequency   |
|----------------------------------------------------------|-------------|
| 1. Databases for academic work                           | 77 (33.47%) |
| 2. Textbooks                                             | 27 (11.74%) |
| 3. "Pop" Psychology Journals (e.g., Psychology and Mind) | 72 (31.3%)  |
| 4. General media (scientific sections ABC, El País ..)   | 13 (5.65%)  |
| 5. Social media (Twitter, YouTube...)                    | 59 (25.65%) |
| 6. Other/undefined                                       | 9 (3.91%)   |



Table 6

Summary of the descriptive statistics of the total score based on the familiarity with scientific dissemination, both according to universities and in the total sample.

| Scientific dissemination | Face-to-face |        |       | Online |        |       | TOTAL |        |       |
|--------------------------|--------------|--------|-------|--------|--------|-------|-------|--------|-------|
|                          | N            | Mean   | SD    | N      | Mean   | SD    | N     | Mean   | SD    |
| No familiarity           | 278          | 178.43 | 17.51 | 402    | 208.82 | 22.13 | 680   | 196.39 | 25.25 |
| Familiarity              | 86           | 173.55 | 20.12 | 150    | 199.89 | 20.95 | 236   | 190.29 | 24.21 |

**Figure 1. Relative frequencies of items 1-20**

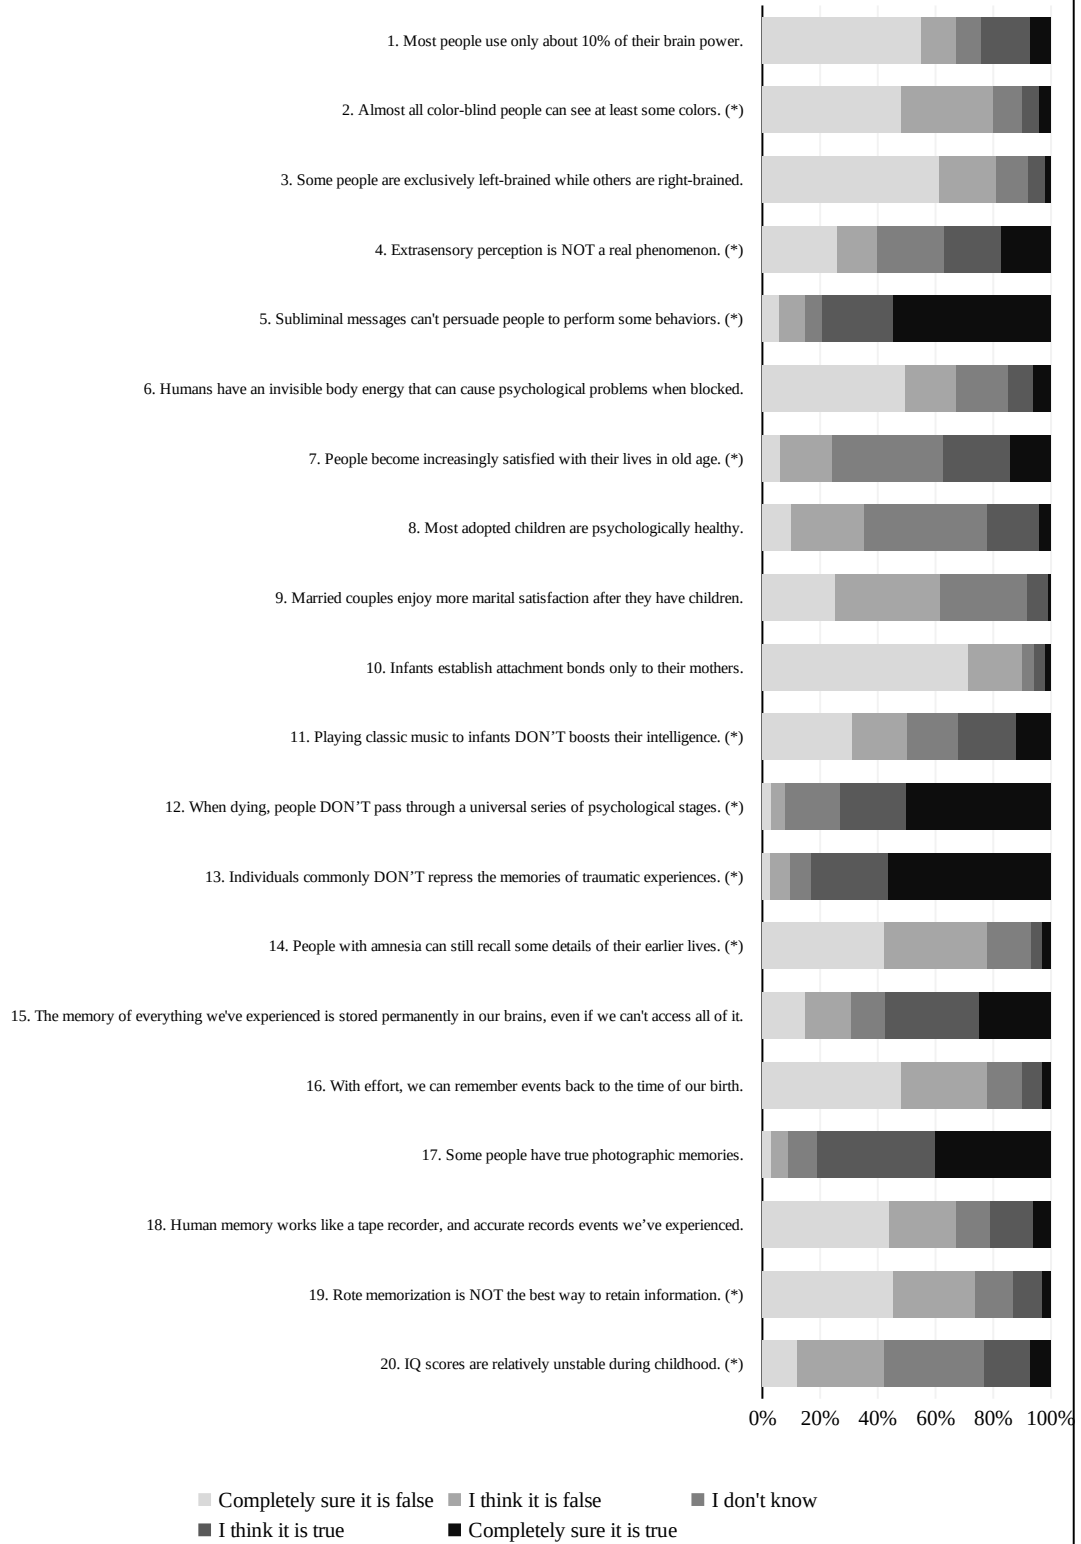

**Figure 2. Relative frequencies of items 21-39.**

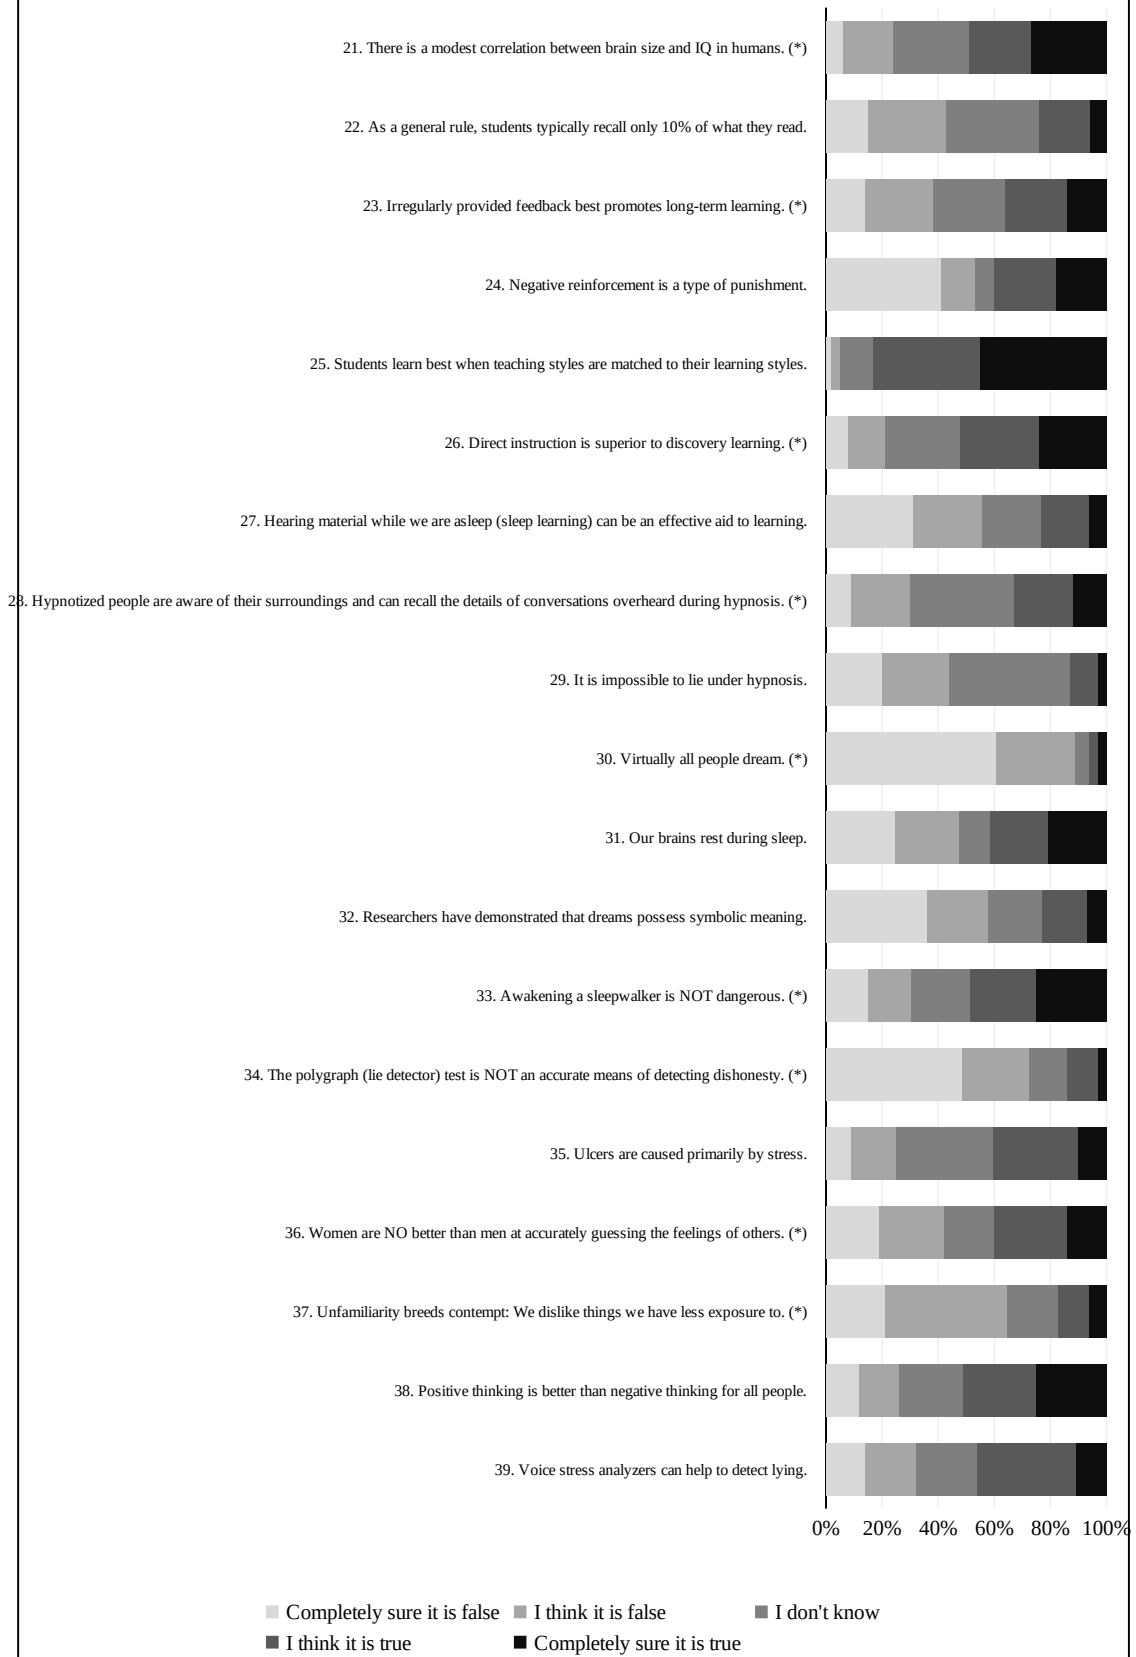

**Figure 3. Relative frequencies of items 40-59.**

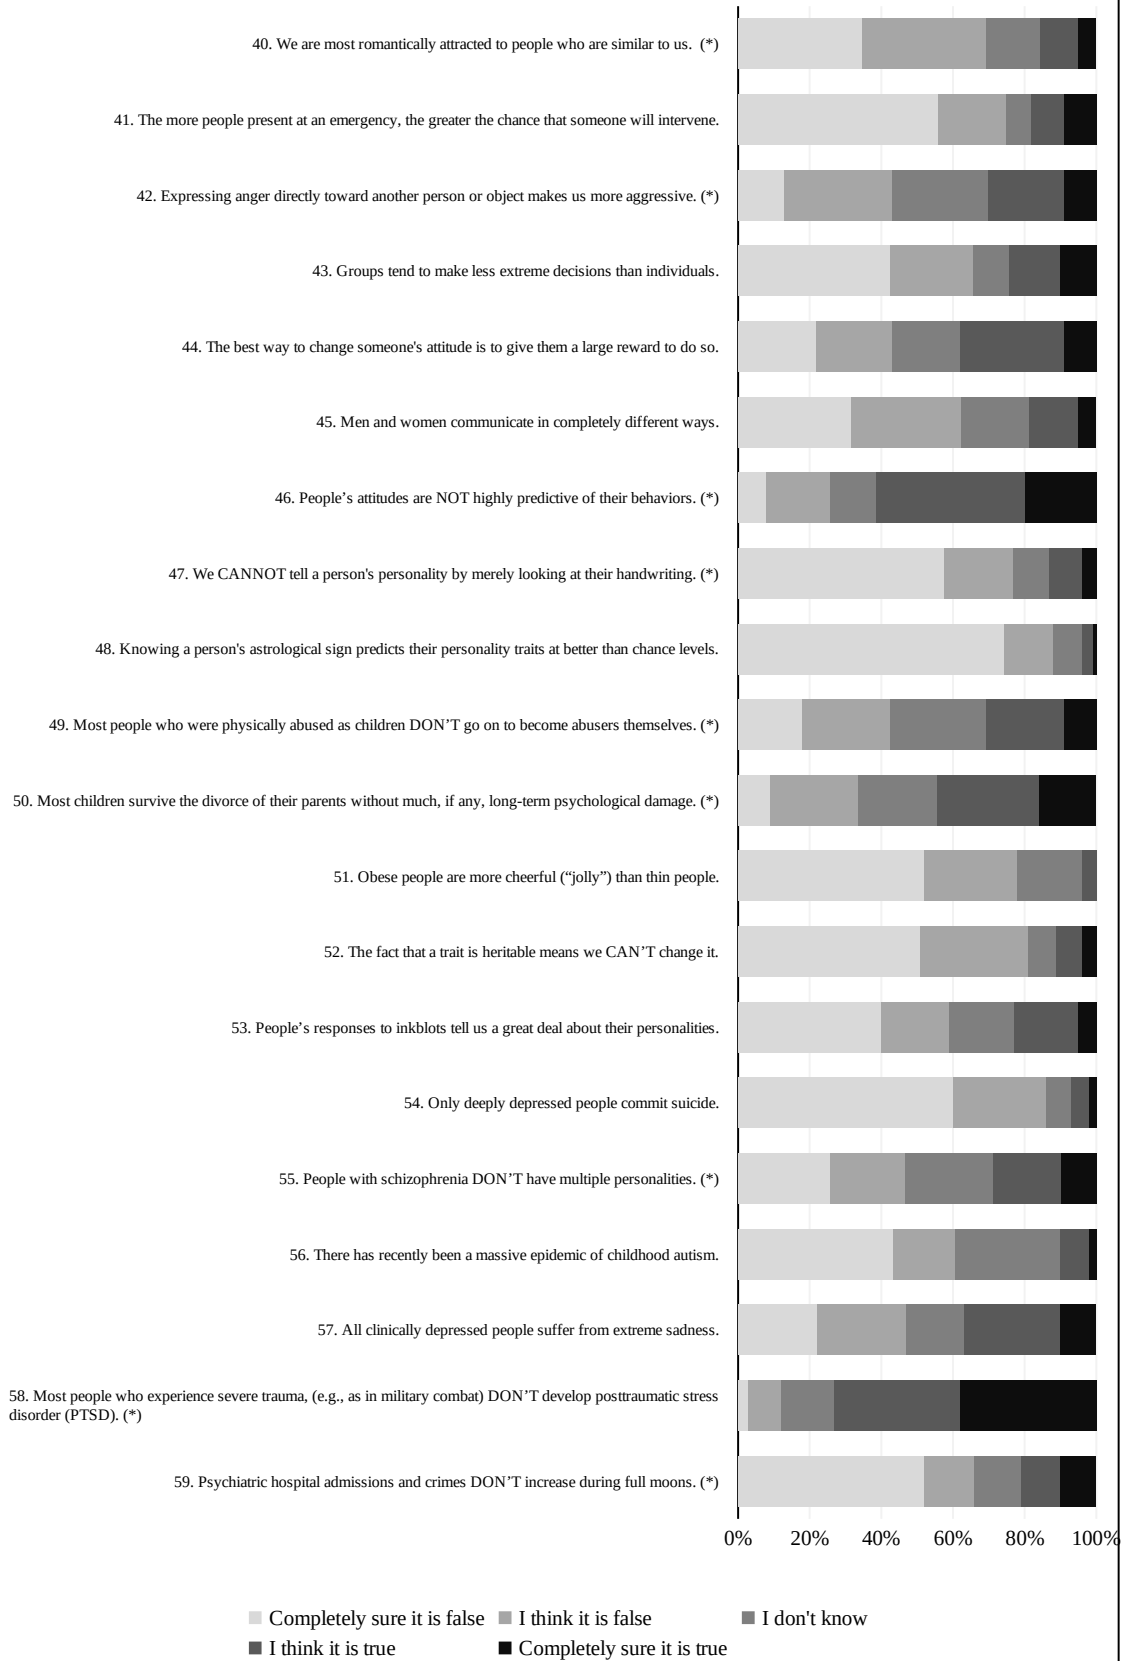

**Figure 4. Relative frequencies of items 60-74.**

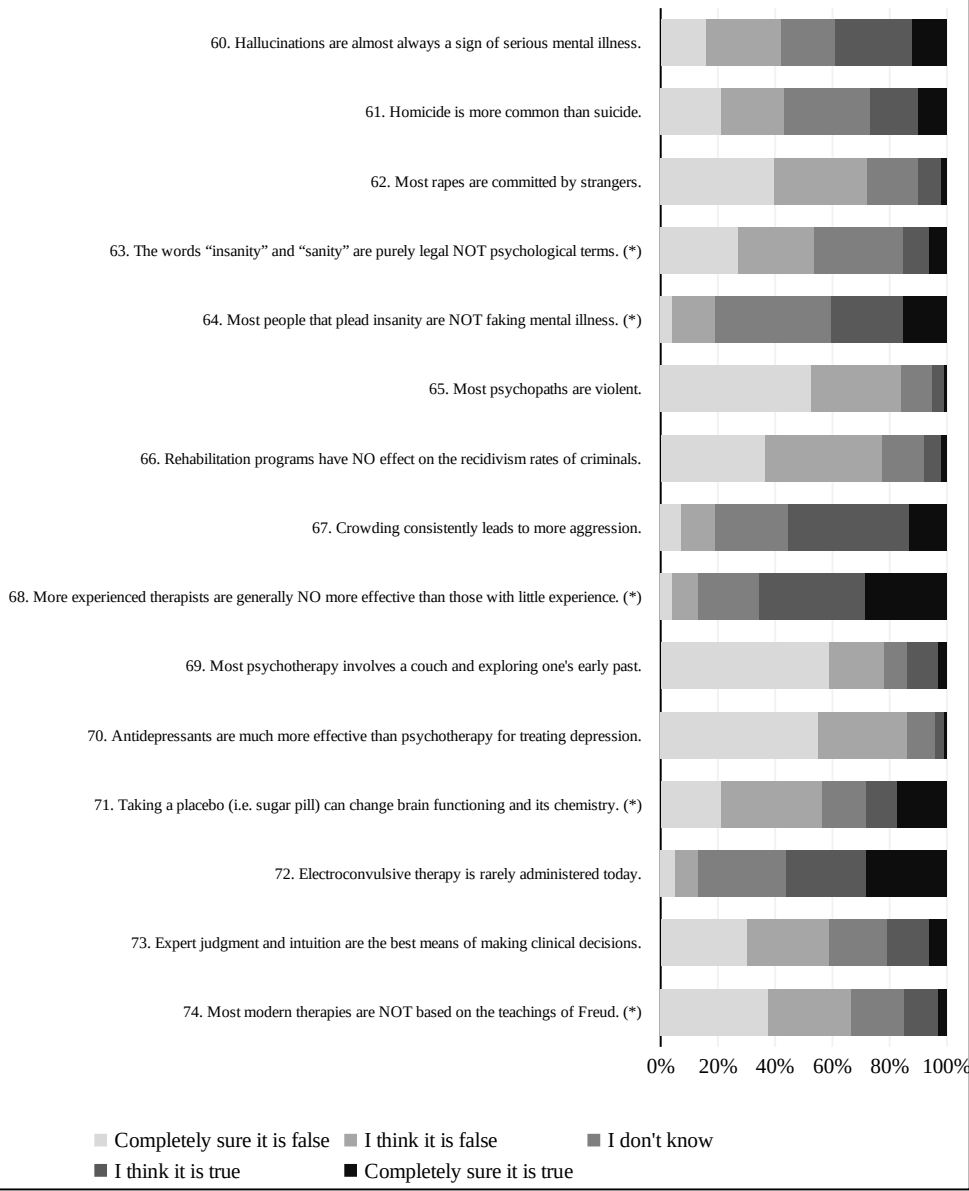

Supplement: SUPPLEMENTARY_MATERIAL_V3.pdf [file SUPPLEMENTARY_MATERIAL_V3.pdf]
